## Research Article

# Association analysis of miRNA-related genetic polymorphisms in miR-143/145 and *KRAS* with colorectal cancer susceptibility and survival

Danyang Wang<sup>1</sup>, Qingmin Liu<sup>2</sup>, Yanjun Ren<sup>2</sup>, Yan Zhang<sup>2</sup>, Xin Wang<sup>3</sup> and  Bing Liu<sup>2</sup>

<sup>1</sup>Department of Colorectal Surgery, The First Affiliated Hospital, College of Medicine, Zhejiang University, Hangzhou, Zhejiang, China; <sup>2</sup>Department of Chronic and Non-communicable Disease Prevention and Control, Hangzhou Center for Disease Control and Prevention, Hangzhou, Zhejiang, China; <sup>3</sup>Department of Pharmacy, Ziyang Community Health Service Center, Hangzhou, Zhejiang, China

**Correspondence:** Bing Liu (elenaliu@163.com)

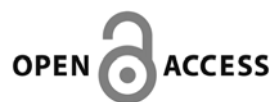

**Background:** There is accumulating evidence of aberrant expression of miR-143 and miR-145 and their target gene *KRAS* in colorectal cancer (CRC). We hypothesize that single nucleotide polymorphisms (SNPs) within or near mRNA-microRNA (miRNA) binding sites may affect miRNA/target gene interaction, resulting in differential mRNA/protein expression and promoting the development and progression of CRC. **Methods:** We conducted a case-control study of 507 patients with CRC recruited from a tertiary hospital and 497 population-based controls to assess the association of genetic polymorphisms in miR-143/145 and the *KRAS* 3' untranslated region (3'UTR) with susceptibility to CRC and patients' survival. In addition, genetic variations of genomic regions located from 500 bp upstream to 500 bp downstream of the miR-143/miR-145 gene and the 3'UTR of *KRAS* were selected for analysis using the Haploview and HaploReg software. **Results:** Using publicly available expression profiling data, we found that miR-143/145 and *KRAS* expression were all reduced in rectal cancer tissue compared with adjacent non-neoplastic large intestinal mucosa. The rs74693964 C/T variant located 65 bp downstream of miR-145 genomic regions was observed to be associated with susceptibility to CRC (adjusted odds ratio (OR): 2.414, 95% CI: 1.385–4.206). Cumulative effects of miR-143 and miR-145 on CRC risk were observed ( $P_{\text{trend}}=0.03$ ). Patients having CRC carrying variant genotype TT of *KRAS* rs712 had poorer survival (log-rank  $P=0.044$ , adjusted hazard ratio (HR): 4.328, 95% CI: 1.236–15.147). **Conclusions:** Our results indicate that miRNA-related polymorphisms in miR-143/145 and *KRAS* are likely to be deleterious and represent potential biomarkers for susceptibility to CRC and patients' survival.

## Introduction

Colorectal cancer (CRC) is one of the most commonly occurring malignancies worldwide. According to The Global Burden of Cancer 2013, colon and rectal cancer ranked third for cancer incidence and fourth for cancer deaths [1]. In China, incidence and mortality statistics of CRC for 2014, published by the National Cancer Center, showed a similar trend, with CRC ranking the third and fifth place for cancer incidence and cancer deaths, respectively [2].

The development of CRC is a multifactorial and multistep process involving the gain and maintenance of specific genomic alterations [3]. Over the past few decades, many associations have been identified between the variation of protein-coding genes and CRC. In the recent years, high-resolution maps of the human transcriptome have led to the discovery of a large number of non-protein-coding RNA genes and brought about a paradigm shift in our understanding of the function of variations in non-coding

Received: 04 December 2020  
Revised: 20 March 2021  
Accepted: 06 April 2021

Accepted Manuscript online:  
07 April 2021  
Version of Record published:  
22 April 2021

RNAs (ncRNAs) [4]. The ncRNAs include a class of short RNA molecules termed microRNAs (miRNAs), which are endogenous small ncRNAs that repress protein-coding genes by binding to target sites in the 3' untranslated region (3'UTR) of mRNAs. These miRNAs are involved in the regulation of almost all physiological and pathological processes, including cell proliferation, differentiation, and apoptosis [5].

MiR-143 and miR-145, which are located close to each other on 5q33, are co-transcribed from a single promoter and generate a primary transcript containing both miRNAs [6]. In 2003, miR-143 and miR-145 were reported to be down-regulated in colorectal tissue for the first time [7]. Subsequently, a series of studies confirmed these results [8–10]. Decreased expression of these two miRNAs is involved in various cancer-related events, including proliferation, invasion, and migration, suggesting that they have anti-tumorigenic activity [11–13]. The *KRAS* oncogene is an important upstream mediator of the MAPK pathway, and its overexpression can lead to increased activation of the RAF/MEK/MAPK pathway, thereby promoting tumorigenesis [14]. *KRAS* is an important target of miR-143/145, which has been identified not only by computational predictions using software such as TargetScan, miRanda, and PicTar, but also by experimental validation [15,16].

Mutations in either miRNAs or their co-expressed miRNA binding sites are often deleterious, which can affect miRNA/target gene interaction, resulting in differential mRNA or protein expression and increased susceptibility to common diseases [17]. This view was supported by some studies of miRNA-related genetic alterations with different types of cancer, including CRC [18–20]. However, published evidence for genetic variations of miR-143/145 and the 3'UTR of *KRAS* with CRC susceptibility are limited and not comprehensively investigated. Therefore, we conducted a case-control study to assess the association between these candidate biomarkers with risk of having CRC.

## Materials and methods

### Study population

The present study was conducted in Hangzhou City, Zhejiang Province, China. Five hundred and seven patients with CRC and four hundred and ninety-seven cancer-free controls were enrolled in the study from May 2014 to May 2015. These patients were recruited from a tertiary hospital in Hangzhou, Zhejiang Province, China. Eligible cases were newly diagnosed and histologically confirmed CRC without pre-operative radiotherapy or chemotherapy. The control population was recruited from among the individuals who came to the community health service centre for medical examinations. The controls had no cancer history or intestinal diseases. All participants were Han Chinese and had lived in Zhejiang Province for more than 20 years.

The study was approved by the Medical Ethical Committee of Hangzhou Center for Disease Control and Prevention (No. 2019-4). All participants had signed informed written consent. Face-to-face interviews were conducted by trained interviewers who administered a structured questionnaire asking about demographic characteristics, family history of cancer, previous medical history, and lifestyle-related factors. Smoking history was defined as having smoked at least one cigarette per day for more than 1 year. Chronic alcohol drinking or tea drinking was defined as having consumed an alcoholic drink or tea for at least once per day for more than 3 months.

### Polymorphism selection and genotyping

First, single nucleotide polymorphisms (SNPs) of genomic regions located from 500 bp upstream to 500 bp downstream of the miR-143/miR-145 gene and the 3'UTR of *KRAS* were downloaded from 1000 Genomes (<http://www.internationalgenome.org/>) if they had minor allele frequency > 0.05 within the Southern Han Chinese (CHS) population. Then, tag single nucleotide polymorphisms (tagSNPs) representing SNPs with the pairwise correlation of  $r^2 > 0.8$  were further selected using the tagger algorithm implemented in the Haploview software. The function of the tagSNPs was predicted using RegulomeDB and HaploReg. Finally five polymorphisms were selected for study: *KRAS* rs712, rs1137196, miR-143 rs41291957, miR-145 rs74693964, and rs80026971. Detailed information regarding the selected SNPs is listed in Supplementary Table S1.

In all the patients, 5 ml of peripheral blood was collected in anticoagulation tube at the time of pre-surgery examination and stored in  $-80^{\circ}\text{C}$  refrigerator. Genomic DNA was extracted from peripheral blood samples using a magnetic bead method with KingFisher Flex (Thermo Scientific, U.S.A.). The concentration and purity of the DNA samples were determined using a NanoDrop2000 spectrophotometer (Thermo Scientific, U.S.A.). Genotyping was performed using the Agena MassArray Genotyping Platform (Agena Inc. San Diego, CA, U.S.A.). Five percent blinded samples were repetitively genotyped and a negative control was interspersed throughout the genotyping assays. The detection rates of all SNP genotyping assays were  $\geq 96\%$ . The concordance rates for duplicated samples were 100%.

## Gene expression analysis

The miR-143/145 microarrays were downloaded from the Gene Expression Omnibus (GEO) database ([www.ncbi.nlm.nih.gov/geo](http://www.ncbi.nlm.nih.gov/geo)), accession no. GSE38389. From this dataset, 66 paired samples from rectal tumor tissue and non-neoplastic large intestinal mucosa samples were collected, and miRNA expression profiles were detected using the GPL11039 platform (Exiqon miRCURY LNA microRNA array v.9.2 Extended Version).

We used OncoPrint ([www.oncoPrint.org](http://www.oncoPrint.org), last accessed on 15 March 2021) to conduct a meta-analysis for *KRAS* gene expression. We extracted the qualified datasets by key words as follows: Gene ‘*KRAS*’; Cancer type: ‘Colorectal cancer’; Analysis type: ‘Cancer vs. Normal Analysis’; Data Type: ‘mRNA’ from the OncoPrint database. There are seven arrays (Ki colon, Kaiser Colon, Skrzypczak Colorectal 2, TCGA Colorectal, Skrzypczak Colorectal, Hong Colorectal, Gaedcke Colorectal) including 578 CRC cases and 179 controls involved in the meta-analysis. Furthermore, We used the UALCAN database (<http://ualcan.path.uab.edu/>) to analyze the *KRAS* mRNA expression based on the TCGA CRC dataset.

## CRC death surveillance

A follow-up survey of the patients with CRC was performed with Hangzhou household registration using the Cancer Registration System and Death Surveillance System of Hangzhou Center for Disease Control and Prevention. The date of censorship was 1 January 2019. We applied the identification card (ID) number and name of patients with CRC to match in order to acquire the survival outcome from the Surveillance Systems. The date and cause of death were recorded for the survival analysis.

## Statistical analysis

A two-sided Student’s *t* test was used to compare the differences in the quantitative data, and a chi-square test was used to compare categorical data between the two groups. Departures from Hardy–Weinberg equilibrium were tested using goodness-of-fit chi-square test. Multivariate logistic regression analysis was performed to explore the association between the selected SNPs and risk of CRC with adjustment for age, gender, and family history of cancer. A likelihood ratio test was used to assess the interaction effects between the SNPs and smoking with respect to CRC. The Cochran–Armitage test was used for trend analysis. Kaplan–Meier survival analysis and log rank test were used to assess survival outcome, that is, overall survival (OS) of the patients in relation to the genotypes. Multivariate Cox regression analysis was performed to calculate relative risk [hazard ratio (HR)] and 95% confidence interval (CI) associated with genetic polymorphisms from cancer diagnosis until the end of the study or death. Statistical analyses were performed using the Statistical Package for the Social Sciences (SPSS) version 25 (IBM, New York, U.S.A.). A *P*-value <0.05 was considered statistically significant.

## Results

### Characteristics of the study population

Of the 507 patients with CRC patients, 209 had colon cancer cases and 298 had rectal cancer cases. The baseline characteristics and lifestyle factors are shown in Table 1. There was no significant difference in age between the cases patients and the controls, but the proportion of males was higher in the cancer group (64.89 vs. 57.95%). In addition, patients with CRC were more likely to have a lower education level and lower body mass index (*P*<0.05) than the controls. CRC patients also reported higher percentages of family history of cancer and history of appendicitis in comparison with controls (*P*=0.034, *P*<0.001, respectively). On the other hand, no significant differences were found between the patients with CRC and control groups with respect to tobacco smoking, alcohol drinking, or tea drinking.

### mRNA expression analysis of miR-143, miR-145, and *KRAS*

We extracted published microarray data from GEO datasets GSE38389 and compared the mRNA expression of miR-143, miR-145 between rectal cancer tissue and adjacent non-neoplastic large intestinal mucosa. As shown in Figure 1, miR-143 expression was under-expressed (log<sub>2</sub>-fold difference < −1) in 26 out of 66 matched pairs of rectal tumor samples and non-neoplastic samples (*P*-value for paired *t* test <0.001). MiR-145 showed the same trend, with decreased expression (log<sub>2</sub>-fold difference < −1) in 28 out of 66 pairs of samples (*P*-value for paired *t* test <0.001) (Figure 1A,B).

We performed a statistical comparison of *KRAS* expression from multiple CRC studies published in OncoPrint database. Seven independent microarray studies comprising a total of 578 CRCs and 179 normal colorectal mucosa samples were evaluated from meta-analysis data by OncoPrint. Meta-analysis identified that *KRAS* mRNA was

**Table 1** Baseline characteristics of study population

| Characteristics                                     | Cases (n=507) | Controls (n=497) | Statistics | P-value |
|-----------------------------------------------------|---------------|------------------|------------|---------|
| Age (years), (mean ± SD)                            | 62.55 ± 11.88 | 62.75 ± 11.99    | 0.264      | 0.792   |
| Gender, n (%)                                       |               |                  |            |         |
| Male                                                | 329 (64.89%)  | 288 (57.95%)     | 5.109      | 0.024   |
| Female                                              | 178 (35.11%)  | 209 (42.05%)     |            |         |
| Former BMI (kg/m <sup>2</sup> ), n (%) <sup>†</sup> |               |                  |            |         |
| <18.5                                               | 18 (3.56%)    | 15 (3.27%)       | 13.038     | 0.001   |
| 18.5–23.9                                           | 298 (58.89%)  | 219 (47.71%)     |            |         |
| ≥23.9                                               | 190 (37.55%)  | 225 (49.02%)     |            |         |
| Education level, n (%)                              |               |                  |            |         |
| Illiterate                                          | 63 (12.45%)   | 25 (5.20%)       | 63.428     | <0.0001 |
| Primary school                                      | 182 (35.97%)  | 91 (18.92%)      |            |         |
| Middle school and above                             | 261 (51.58%)  | 365 (75.88%)     |            |         |
| Marital status, n (%)                               |               |                  |            |         |
| Married                                             | 504 (99.41%)  | 412 (84.08%)     | 78.418     | <0.0001 |
| Unmarried                                           | 3 (0.59%)     | 78 (15.92%)      |            |         |
| Family history of cancer, n (%)                     |               |                  |            |         |
| No                                                  | 408 (80.47%)  | 425 (85.51%)     | 4.511      | 0.034   |
| Yes                                                 | 99 (19.53%)   | 72 (14.49%)      |            |         |
| History of appendicitis                             |               |                  |            |         |
| No                                                  | 477 (94.08%)  | 489 (98.39%)     | 12.787     | <0.0001 |
| Yes                                                 | 30 (5.92%)    | 8 (1.61%)        |            |         |
| Smoking, n (%) <sup>*</sup>                         |               |                  |            |         |
| No                                                  | 324 (63.91%)  | 338 (69.12%)     | 0.353      | 0.552   |
| Yes                                                 | 183 (36.09%)  | 151 (30.88%)     |            |         |
| Alcohol consumption, n (%) <sup>*</sup>             |               |                  |            |         |
| No                                                  | 359 (70.81%)  | 353 (71.03%)     | 0.772      | 0.380   |
| Yes                                                 | 148 (29.19%)  | 144 (28.97%)     |            |         |
| Tea consumption, n (%) <sup>*</sup>                 |               |                  |            |         |
| No                                                  | 230 (45.36%)  | 239 (48.09%)     | 0.046      | 0.830   |
| Yes                                                 | 277 (54.64%)  | 258 (51.91%)     |            |         |

<sup>\*</sup> Cochran–Mantel–Haenszel test, adjusted by sex.

<sup>†</sup> BMI of 5 years before investigation.

under-expressed in CRC tissue (median rank = 2534.5,  $P=0.001$ ). Based on the UALCAN data, *KRAS* mRNA expression was down-regulated in CRC tissue (Figure 2A,B). The expression of *KRAS* in CRC samples at any stages was lower than that in normal samples (Figure 3A,B).

### Polymorphisms of miR-143, miR-145, and *KRAS* 3'UTR and risk of CRC

*KRAS* rs712 and rs1137196, miR-143 rs41291957, and miR-145 rs74693964 and rs80026971 were genotyped in the present study. The genotype distribution of the five SNPs in the control group all conformed to Hardy–Weinberg equilibrium; their associations with the risk of CRC are presented in Table 2. As shown in the table, subjects with the heterozygous genotype CT of rs74693964 were more than twice as likely to have CRC as subjects with the wild genotype CC [adjusted odds ratio (OR) = 2.414, 95% CI: 1.385–4.206]. MiR-145 rs74693964 was associated with a significantly increased risk of CRC. However, *KRAS* rs712 and rs1137196, miR-143 rs41291957, and miR-145 rs80026971 showed no association with the risk of CRC. In the subgroup analysis, rs41291957 and rs74693964 were found to be associated with an increased risk of rectal cancer but not colon cancer (rs41291957 GA vs. AA: adjusted OR = 1.367, 95% CI: 1.005–1.860; rs74693964 CT vs. CC: adjusted OR = 2.820, 95% CI: 1.547–5.140) (Tables 2 and 3).

When stratified by smoking status, we found that the genotype distributions of miR-143 rs41291957 among non-smokers differed significantly between cases and controls. Compared with the GG genotype, those carrying heterozygous genotype GA had a nearly 40% increased risk for developing CRC (adjusted OR = 1.397, 95% CI: 1.007–1.936). In non-smokers, miR-145 rs74693964 remained a significant risk factor for CRC among subjects carrying the CT genotype (adjusted OR = 3.086, 95% CI: 1.468–6.484). Interaction analyses of the two SNPs and tobacco

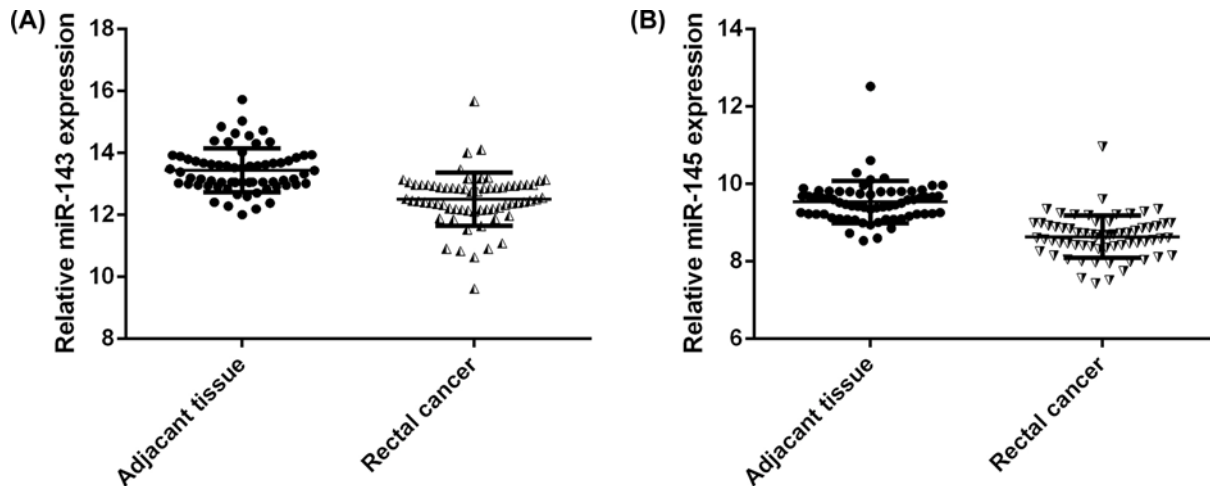

**Figure 1. MiR-143, miR-145 expression in samples for rectal cancer and adjacent normal mucosa**

(A) MiR-143 expression in rectal cancer and matched normal mucosa in the rectal cancer study identified from the GEO profile database (accession number GSE38389). Of the 66 tumor biopsies and corresponding matched mucosa samples, 50 were under-expressed ( $\log_2$ -fold difference  $< -0.5$ ) and four highly expressed ( $\log_2$ -fold difference  $> 0.5$ ) in rectal cancer tissue compared with adjacent normal controls ( $P$ -value for paired  $t$  test  $< 0.001$ ). (B) MiR-145 expression in rectal cancer and matched normal mucosa in the rectal cancer study identified from the GEO profile database (accession number GSE38389). Of the 66 tumor biopsies and corresponding matched mucosa sample, 50 were under-expressed ( $\log_2$ -fold difference  $< -0.5$ ) and one highly expressed ( $\log_2$ -fold difference  $> 0.5$ ) in rectal cancer tissue compared with adjacent normal controls ( $P$ -value for paired  $t$  test  $< 0.001$ ).

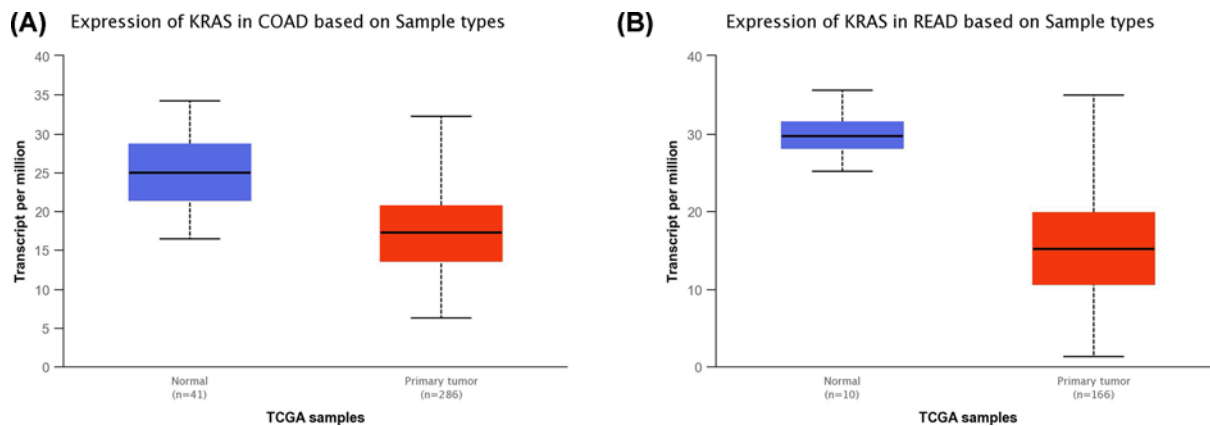

**Figure 2. KRAS mRNA expression in CRC from TCGA dataset**

(A) *KRAS* mRNA expression in colon cancer tissue and adjacent normal mucosa. Box plot and  $P$ -value were produced using UALCAN.  $P=9.41025035672283E-13$ . (B) *KRAS* mRNA expression in rectal cancer tissue and adjacent normal mucosa. Box plot and  $P$ -value were produced using UALCAN.  $P=1.649440E-04$ .

smoking were conducted using a multiplicative model; neither interaction effect showed statistical significance (Table 4).

Although miR-143 and miR-145 are located close to each other on 5q33, our analysis showed no linkage disequilibrium between them. To evaluate the potential cumulative effects of miR-143 and miR-145, we defined at-risk genotypes as those with  $OR$  values greater than 1 under a dominant model of rs41291957 and rs74693964. We compared the distributions of the number of at-risk genotypes between cancer cases and controls. The risk of having CRC increased with the number of at-risk genotypes ( $P_{\text{trend}}=0.003$ ). When split by cancer location, individuals harboring two at-risk genotypes had an increased risk of rectal cancer relative to those with none ( $OR = 3.738$ , 95%  $CI$ : 1.725–8.101) (Table 5).

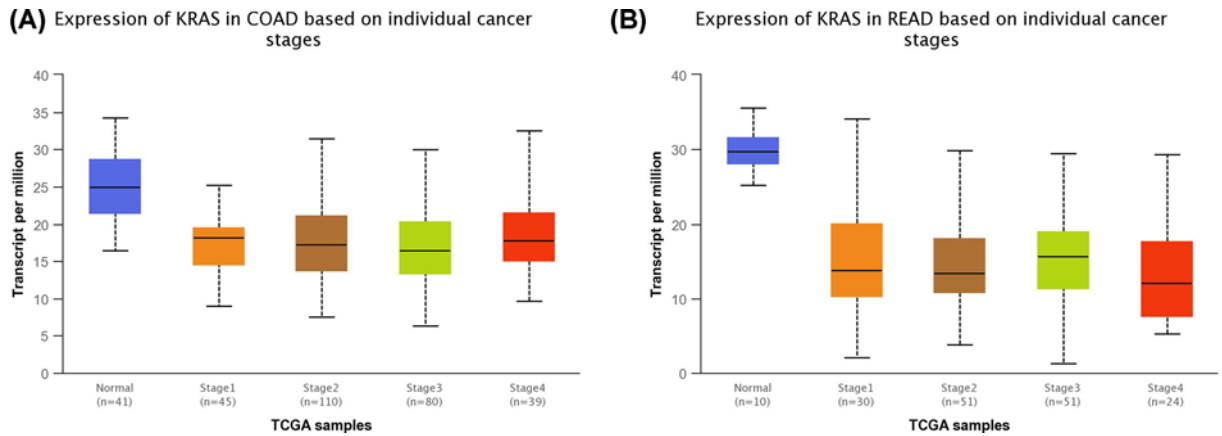

**Figure 3.** KRAS mRNA expression in samples for CRC based on individual cancer stages from TCGA dataset

(A) KRAS expression in samples for colon cancer based on individual cancer stages. Using the UALCAN data, the expression of KRAS in colon cancer samples at any stages was lower than that in normal samples. Normal-vs-Stage1,  $P=6.19280005054179E-09$ ; Normal-vs-Stage2,  $P=1.27364785384998E-12$ ; Normal-vs-Stage3,  $P=1.37959976775903E-10$ ; Normal-vs-Stage4,  $P=1.5826999999128E-05$ . (B) KRAS expression in samples for rectal cancer based on individual cancer stages. Using the UALCAN data, the expression of KRAS in rectal cancer samples at any stages was lower than that in normal samples. Normal-vs-Stage1,  $P=2.022800E-01$ ; Normal-vs-Stage2,  $P=3.7032000000479E-05$ ; Normal-vs-Stage3,  $P=1.815890E-04$ ; Normal-vs-Stage4,  $P=1.881260E-03$ .

**Table 2** Genetic association analyses of selected SNPs with CRC risk

| Gene symbol | Genotype    | Cases (n%)   | Controls (n%) | OR (95% CI)*        | P-value |
|-------------|-------------|--------------|---------------|---------------------|---------|
| KRAS        | rs712       |              |               |                     |         |
|             | GG          | 301 (60.4%)  | 313 (64.1%)   | 1.0                 |         |
|             | GT          | 179 (35.9%)  | 159 (32.6%)   | 1.190 (0.911–1.555) | 0.201   |
|             | TT          | 18 (3.6%)    | 16 (3.3%)     | 1.184 (0.591–2.372) | 0.634   |
|             | G allele    | 781 (78.4%)  | 785 (80.4%)   |                     |         |
| T allele    | 215 (21.6%) | 191 (19.6%)  |               |                     |         |
| KRAS        | rs1137196   |              |               |                     |         |
|             | CC          | 295 (59.7%)  | 299 (62.2%)   | 1.0                 |         |
|             | CA          | 180 (36.4%)  | 167 (34.7%)   | 1.108 (0.849–1.446) | 0.452   |
|             | AA          | 19 (3.8%)    | 15 (3.1%)     | 1.303 (0.648–2.621) | 0.458   |
|             | C allele    | 770 (77.9%)  | 765 (79.5%)   |                     |         |
| A allele    | 218 (22.1%) | 197 (20.5%)  |               |                     |         |
| miR-143     | rs41291957  |              |               |                     |         |
|             | GG          | 208 (41.4%)  | 226 (46.1%)   | 1.0                 |         |
|             | GA          | 246 (48.9%)  | 210 (42.9%)   | 1.275 (0.979–1.662) | 0.072   |
|             | AA          | 49 (9.7%)    | 54 (11%)      | 0.977 (0.634–1.505) | 0.915   |
|             | G allele    | 662 (65.8%)  | 662 (67.5%)   |                     |         |
| A allele    | 344 (34.2%) | 318 (32.5%)  |               |                     |         |
| miR-145     | rs74693964  |              |               |                     |         |
|             | CC          | 462 (91.1%)  | 470 (96.1%)   | 1.0                 |         |
|             | CT          | 45 (8.9%)    | 19 (3.9%)     | 2.414 (1.385–4.206) | 0.002   |
|             | C allele    | 969 (95.6%)  | 959 (98.1%)   |                     |         |
| T allele    | 45 (4.4%)   | 19 (1.9%)    |               |                     |         |
| miR-145     | rs80026971  |              |               |                     |         |
|             | GG          | 497 (98%)    | 487 (98.6%)   | 1.0                 |         |
|             | GC          | 10 (2%)      | 7 (1.4%)      | 1.220 (0.457–3.258) | 0.692   |
|             | C allele    | 1004 (99.0%) | 981 (99.3%)   |                     |         |
| T allele    | 10 (1.0%)   | 7 (0.7%)     |               |                     |         |

\*OR (95% CI) adjusted by age, sex, and family history of cancer.

**Table 3 Genetic association analyses of selected SNPs with colon cancer and rectal cancer risk**

| Gene symbol | Genotype   | Colon cancer (n=209) |               |                        |         | Rectal cancer (n=298) |               |                        |         |
|-------------|------------|----------------------|---------------|------------------------|---------|-----------------------|---------------|------------------------|---------|
|             |            | Cases (n%)           | Controls (n%) | OR (95% CI)*           | P-value | Cases (n%)            | Controls (n%) | OR (95% CI)*           | P-value |
| KRAS        | rs712      |                      |               |                        |         |                       |               |                        |         |
|             | GG         | 118 (57.8)           | 315 (64.3)    | 1.0                    |         | 183 (62.2)            | 315 (64.3)    | 1.0                    |         |
|             | GT         | 74 (36.3)            | 159 (32.4)    | 1.260<br>(0.889–1.787) | 0.194   | 105 (35.7)            | 159 (32.4)    | 1.147<br>(0.842–1.562) | 0.385   |
|             | TT         | 12 (5.9)             | 16 (3.3)      | 1.998<br>(0.916–4.362) | 0.082   | 6 (2.0)               | 16 (3.3)      | 0.654<br>(0.250–1.712) | 0.387   |
| KRAS        | rs1137196  |                      |               |                        |         |                       |               |                        |         |
|             | CC         | 113 (55.9)           | 301 (62.3)    | 1.0                    |         | 182 (62.3)            | 301 (62.3)    | 1.0                    |         |
|             | CA         | 78 (38.6)            | 167 (34.6)    | 1.269<br>(0.897–1.796) | 0.179   | 102 (34.9)            | 167 (34.6)    | 1.010<br>(0.741–1.377) | 0.949   |
|             | AA         | 11 (5.4)             | 15 (3.1)      | 1.943<br>(0.864–4.372) | 0.108   | 8 (2.7)               | 15 (3.1)      | 0.913<br>(0.377–2.211) | 0.840   |
| miR-143     | rs41291957 |                      |               |                        |         |                       |               |                        |         |
|             | GG         | 88 (42.3)            | 226 (45.9)    | 1.0                    |         | 120 (40.7)            | 226 (45.9)    | 1.0                    |         |
|             | GA         | 97 (46.6)            | 212 (43.1)    | 1.177<br>(0.833–1.663) | 0.355   | 149 (50.5)            | 212 (43.1)    | 1.367<br>(1.005–1.860) | 0.046   |
|             | AA         | 23 (11.1)            | 54 (11.0)     | 1.075<br>(0.621–1.862) | 0.796   | 26 (8.8)              | 54 (11.0)     | 0.904<br>(0.537–1.522) | 0.704   |
| miR-145     | rs74693964 |                      |               |                        |         |                       |               |                        |         |
|             | CC         | 194 (92.8)           | 472 (96.1)    | 1.0                    |         | 268 (89.9)            | 472 (96.1)    | 1.0                    |         |
|             | CT         | 15 (7.2)             | 19 (3.9)      | 1.901<br>(0.943–3.835) | 0.073   | 30 (10.1)             | 19 (3.9)      | 2.820<br>(1.547–5.140) | 0.001   |
| miR-145     | rs80026971 |                      |               |                        |         |                       |               |                        |         |
|             | GG         | 207 (99.0)           | 489 (98.6)    | 1.0                    |         | 290 (97.3)            | 489 (98.6)    | 1.0                    |         |
|             | GC         | 2 (1.0)              | 7 (1.4)       | 0.608<br>(0.124–2.976) | 0.540   | 8 (2.7)               | 7 (1.4)       | 1.694<br>(0.602–4.765) | 0.318   |

\*OR (95%CI) adjusted by age, sex, and family history of cancer.

### Polymorphisms of miR-143, miR-145, and KRAS 3'UTR and CRC survival

A total of 222 CRC cases with Hangzhou household registration had survival data extracted from the Cancer Registration System and Death Surveillance System of Hangzhou Center for Disease Control and Prevention. Of the 222 patients with CRC recruited between May 2014 and May 2015, 34 died of CRC by 1 January 2019. Associations between polymorphisms of miR-143, miR-145, and the KRAS 3'UTR and survival of patients with CRC were explored. First, we used the Kaplan–Meier method to compare OS among different genotypes of selected SNPs. Then, adjusted hazard regressions (HRs) were obtained by Cox regression analysis for further confirmation of the relationships between the genotypes and survival of patients with CRC. The results showed that the mutant homozygote TT of rs712 was associated with decreased survival time of patients with CRC (log-rank test,  $P=0.044$ ). Compared with the reference genotype GG of rs712, the CRC cases with TT genotype had a significant increase in number of deaths (adjusted  $HR = 4.328$ , 95%  $CI: 1.236–15.147$ ). The polymorphisms of miR-143 and miR-145 did not show any statistical association with survival of patients with CRC (Table 6).

### Discussion

MiR-143 and miR-145 which are located on 5q23 which may originate from the same primary miRNA. Michael et al. showed that miR-143 and miR-145 displayed consistently decreased expression levels of mature miRNA at the colorectal neoplasm when compared with healthy colorectal mucosa. Several other studies have confirmed this finding [9,21]. The present study found that both miR-143/145 showed reduced expression in rectal cancer when compared with adjacent non-neoplastic large intestinal mucosa based on microarray gene expression datasets from GEO, which is consistent with previous studies. KRAS is one of the most frequently mutated genes in CRC risk. A number of recent studies have demonstrated the significance of KRAS mutation in CRC carcinogenesis [15,22]; however, KRAS gene expression status in CRC has been less reported. In view of this, we conducted a meta-analysis for KRAS gene expression from multiple CRC studies published in Oncomine database. We found that KRAS expression was

**Table 4 Association of selected SNPs with CRC risk after stratification by smoking status**

| Gene symbol                | Genotype   | Smoker      |               |                         |         | Non-smoker             |                         |                        |         |
|----------------------------|------------|-------------|---------------|-------------------------|---------|------------------------|-------------------------|------------------------|---------|
|                            |            | Cases (n%)  | Controls (n%) | OR (95% CI)*            | P-value | Cases (n%)             | Controls (n%)           | OR (95% CI)*           | P-value |
| KRAS                       | rs712      |             |               |                         |         |                        |                         |                        |         |
|                            | GG         | 108 (60.3%) | 100 (66.7%)   | 1.0                     |         | 193 (60.5%)            | 209 (63.0)              | 1.0                    |         |
|                            | GT         | 66 (36.9%)  | 48 (32.0%)    | 1.361<br>(0.848–2.184)  | 0.202   | 113 (35.4%)            | 109 (32.8)              | 1.112<br>(0.799–1.546) | 0.529   |
|                            | TT         | 5 (2.8%)    | 2 (1.3%)      | 2.358<br>(0.444–12.514) | 0.314   | 13 (4.1%)              | 14 (4.2)                | 0.960<br>(0.438–2.106) | 0.920   |
|                            | GT+TT      | 71 (39.7%)  | 50 (33.3%)    | 1.402<br>(0.880–2.232)  | 0.155   | 126 (39.5%)            | 123 (37.0)              | 1.094<br>(0.796–1.504) | 0.579   |
| Multiplicative interaction |            |             |               |                         |         |                        | 1.263<br>(0.725–2.203)  | 0.410                  |         |
| KRAS                       | rs1137196  |             |               |                         |         |                        |                         |                        |         |
|                            | CC         | 105 (59.7)  | 98 (66.7)     | 1.0                     |         | 190 (59.7)             | 198 (60.2)              | 1.0                    |         |
|                            | CA         | 65 (36.9)   | 47 (32.0)     | 1.354<br>(0.841–2.180)  | 0.212   | 115 (36.2)             | 118 (35.9)              | 1.003<br>(0.723–1.391) | 0.986   |
|                            | AA         | 6 (3.4)     | 2 (1.4)       | 2.835<br>(0.555–14.479) | 0.210   | 13 (4.1)               | 13 (4.0)                | 1.001<br>(0.449–2.229) | 0.999   |
|                            | CA+AA      | 71 (40.3)   | 49 (33.4)     | 1.415<br>(0.887–2.259)  | 0.145   | 128 (40.3)             | 131 (39.9)              | 1.003<br>(0.730–1.377) | 0.987   |
| Multiplicative interaction |            |             |               |                         |         |                        | 1.423<br>(0.814–2.487)  | 0.215                  |         |
| miR-143                    | rs41291957 |             |               |                         |         |                        |                         |                        |         |
|                            | GG         | 78 (43.1%)  | 66 (44.0%)    | 1.0                     |         | 130 (40.4%)            | 157 (46.9%)             | 1.0                    |         |
|                            | GA         | 83 (45.9%)  | 67 (44.7%)    | 1.079<br>(0.677–1.721)  | 0.748   | 163 (50.6%)            | 141 (42.1%)             | 1.397<br>(1.007–1.936) | 0.045   |
|                            | AA         | 20 (11.0%)  | 17 (11.3%)    | 0.956<br>(0.460–1.986)  | 0.905   | 29 (9.0%)              | 37 (11.0%)              | 0.918<br>(0.533–1.580) | 0.756   |
|                            | GA+AA      |             |               | 1.053<br>(0.677–1.640)  | 0.818   |                        |                         | 1.296<br>(0.949–1.770) | 0.103   |
| Multiplicative interaction |            |             |               |                         |         |                        | 0.805<br>(0.470–1.378)  | 0.429                  |         |
| miR-143                    | rs74693964 |             |               |                         |         |                        |                         |                        |         |
|                            | CC         | 167 (91.3%) | 140 (94.0%)   | 1.0                     |         | 295 (91.0%)            | 324 (97.0%)             | 1.0                    |         |
|                            | CT         | 16 (8.7%)   | 9 (6.0%)      | 1.672<br>(0.687–4.070)  | 0.257   | 29 (9.0%)              | 10 (3.0%)               | 3.086<br>(1.468–6.484) | 0.003   |
| Multiplicative interaction |            |             |               |                         |         | 0.473<br>(0.153–1.462) | 0.194                   |                        |         |
| miR-145                    | rs80026971 |             |               |                         |         |                        |                         |                        |         |
|                            | GG         | 181 (98.9%) | 150 (99.3)    | 1.0                     |         | 316 (97.5%)            | 331 (98.2%)             | 1.0                    |         |
|                            | GC         | 2 (1.1%)    | 1 (0.7)       | 1.290<br>(0.113–14.738) | 0.838   | 8 (2.5%)               | 6 (1.8%)                | 1.199<br>(0.406–3.539) | 0.742   |
| Multiplicative interaction |            |             |               |                         |         |                        | 1.141<br>(0.080–16.168) | 0.922                  |         |

\*OR (95% CI) adjusted by age, sex, and family history of cancer.

down-regulated in CRC tissues in four stages of the cancer. Mazza et al. evaluated of the miRNAome and transcriptome of matched pairs of tumor and adjacent non-neoplastic large intestinal mucosa samples of CRC. They noted concurrent down-regulation of *KRAS* and the miR-143/145 cluster in CRC tissue [16]. This result was interpreted in terms of a feed-forward mechanism in which the miR-143/145 polycistronic cluster targets the RAS-responsive element-binding protein RREB1 and *KRAS*, which, in turn, induce down-regulation of the cluster [14].

Emerging evidence has shown that miRNA-related SNPs may alter an individual's susceptibility to CRC by disrupting miRNAs' process, expression, or interaction with target mRNA [23]. However, no SNP of the miR-143 and miR-145 genes could be identified by the HapMap and SNP database (dbSNP) retrieval. Thus we selected the SNPs within the miRNA regulatory region/transcription factor-binding sites for further study. MiR-145 rs74693964 is located 65 bp downstream of miR-145. According to functional predictions based on HaploReg annotations [24] and



**Table 5 Genetic association analyses of number of at-risk genotypes within rs41291957 and rs74693964 with colon cancer and rectal cancer risk**

| Number of at-risk genotypes | Colon cancer |               |                        |         | Rectal cancer |               |                        |         | CRC        |               |                        |         |
|-----------------------------|--------------|---------------|------------------------|---------|---------------|---------------|------------------------|---------|------------|---------------|------------------------|---------|
|                             | Cases (n%)   | Controls (n%) | OR (95% CI)*           | P-value | Cases (n%)    | Controls (n%) | OR (95% CI)*           | P-value | Cases (n%) | Controls (n%) | OR (95% CI)*           | P-value |
| 0                           | 106 (51.0)   | 270 (55.4)    | 1.0                    |         | 136 (46.1)    | 270 (55.4)    | 1.0                    |         | 242 (48.1) | 270 (55.4)    | 1.0                    |         |
| 1                           | 92 (44.2)    | 206 (42.3)    | 1.151<br>(0.824–1.607) | 0.411   | 139 (47.1)    | 206 (42.3)    | 1.378<br>(1.026–1.874) | 0.033   | 231 (45.9) | 206 (42.3)    | 1.273<br>(0.984–1.647) | 0.066   |
| 2                           | 10 (4.8)     | 11 (2.3)      | 2.242<br>(0.918–5.475) | 0.076   | 20 (6.8)      | 11 (2.3)      | 3.738<br>(1.725–8.101) | 0.001   | 30 (6.0)   | 11 (2.3)      | 3.032<br>(1.479–6.215) | 0.002   |
| <i>P</i> <sub>trend</sub>   |              |               |                        | 0.128   |               |               |                        | 0.001   |            |               |                        | 0.003   |

\*OR (95%CI) adjusted by age, sex, and family history of cancer.

**Table 6 Kaplan–Meier survival estimation of mean survival and HRs of selected SNPs**

| Gene symbol | Genotypes  | n%         | Mean survival (in months)  | Log rank, P-value | HR (95% CI)*, P-value       |
|-------------|------------|------------|----------------------------|-------------------|-----------------------------|
| KRAS        | rs712      |            |                            |                   |                             |
|             | GG         | 137 (62.5) | 51.94                      | 0.044             | 1.0                         |
|             | GT         | 74 (33.8)  | 48.66                      |                   | 1.672 (0.815–3.432), 0.161  |
|             | TT         | 8 (3.7)    | 37.00                      |                   | 4.328 (1.236–15.147), 0.022 |
| rs1137196   |            |            |                            |                   |                             |
| KRAS        | CC         | 131 (61.5) | 52.28                      | 0.098             | 1.0                         |
|             | CA         | 75 (35.2)  | 47.49                      |                   | 1.860 (0.913–3.788), 0.088  |
|             | AA         | 7 (3.3)    | 41.29                      |                   | 3.030 (0.676–13.578), 0.147 |
| miR-143     | rs41291957 |            |                            |                   |                             |
|             | GG         | 93 (42.5)  | 47.49                      | 0.123             | 1.0                         |
|             | GA         | 105 (47.9) | 52.07                      |                   | 0.573 (0.280–1.174), 0.128  |
| AA          | 21 (9.6)   | 48.82      | 0.375 (0.078–1.613), 0.188 |                   |                             |
| miR-145     | rs74693964 |            |                            |                   |                             |
|             | CC         | 201 (90.5) | 51.14                      | 0.441             | 1.0                         |
|             | CT         | 21 (9.5)   | 49.43                      |                   | 0.491 (0.117–2.056), 0.330  |
| rs80026971  |            |            |                            |                   |                             |
| miR-145     | GG         | 218 (98.2) | 51.34                      | 0.557             | 1.0                         |
|             | GC         | 4 (1.8)    | 41.25                      |                   | 1.481 (0.195–11.235), 0.704 |

\*HR (95% CI) adjusted by age, sex, and tumor stage.

the RegulomeDB database [25], this SNP has been identified as a promoter histone modification or enhancer histone modification region in more than 20 tissues, including colonic mucosa and rectal mucosa. In the present study, individuals with the CT genotype of rs74693964 in the Chinese population had a two-fold increased risk for having CRC when compared with those carrying the CC genotype. After stratification by smoking status, miR-145 rs74693964 was found to be significantly associated with an increased risk of CRC among patients who were non-smokers. To date, only two studies have reported an association of miR-145 rs74693964 with risk of cancer; one was a study of cervical cancer and the other of non-small-cell lung cancer [26,27]. No similar study involving CRC has yet been reported. To our knowledge, the present work is the first investigation of the link between miR-145 rs74693964 and risk of CRC in the Chinese population.

In previous studies, Li et al. [28] reported a significant effect of mutant genotypes or alleles of rs41291957 on risk of having CRC. On the other hand, Ying et al. [29] failed to find any association between rs41291957 and susceptibility to CRC. In our study, risk of rectal cancer was shown to be associated with the rs41291957 heterozygous genotype. Rs41291957 is located 91 base pairs (bp) upstream of miR-143. Saini et al. demonstrated that up to 60% of miRNAs have transcription factor binding sites (TFBSs) within 1 kilobases (kb) of the start of the pre-miRNA [30], indicating that rs41291957 in the promoter region may be involved in the transcriptional activation of miR-143. Furthermore,

bioinformatic predictions using HaploReg and RegulomeDB indicated that rs41291957 is probably involved in epigenetic modifications that promote colorectal tumorigenesis.

In the present study, the cumulative effects of significant polymorphisms of miR-143 and miR-145 were evaluated in CRC. The risk of CRC increased with the number of at-risk genotypes, especially in rectal cancer. The average SNP density of clustered miRNAs was significantly lower than that of the individual miRNAs, which may to some degree reflect the critical biological functions regulated by clustered miRNAs [31]. The miR-143/145 cluster co-ordinately plays an important part in the carcinogenesis of CRC [32]. It is thus a reasonable assumption that the more mutations occur in the miR-143/145 cluster, the greater the risk of CRC.

*KRAS* is a direct target of miR-143/145. In the present study, no SNP was identified within the binding region of miR-143/145, nor was there any association with risk of having CRC. However, our results indicated that the rs712 G>T polymorphism in the 3'UTR of the *KRAS* gene may modulate survival outcome of patients with CRC. Multiple miRNAs, including miR-200b, miR-200c, and miR-429, target rs712. The miR-200 family (miR-200b, miR-200c, and miR-429) has been widely investigated with regard to its role in tumor metastasis and regulating cancer stem cells [33]. Pichler et al. found that miR-200 family expression was associated with poor prognosis in patients with CRC and with cancer stem cell properties in CRC [34]. Therefore, the rs712 G>T change might attenuate its binding capacity with the miR-200 family. Although the association between the *KRAS* rs712 polymorphism and cancer risk has been widely studied [35–37], the effects of this polymorphism on survival of patients with CRC are still unclear. Schneiderova et al. [38] indicated that individuals with colon cancer carrying the heterozygous GT genotype had longer OS. On the other hand, the survival impact of rs712 on survival of patients with CRCI was not significant in a study by Dai and colleagues [39]. Our study suggests that a poor prognosis in Chinese patients with CRC is associated with the homozygous TT genotype. The limited and conflicting results on the prognostic value of *KRAS* rs712 as a predictor for survival of patients with CRC indicate that more studies in different populations are required.

There were some limitations to the present study. First, owing to the lack of RNA samples for the study population, we were unable to carry out functional validation tests. The biological functions of the selected SNPs in CRC were inferred and predicted using the available online tools. Second, the participants in the cancer group and control group were collected from a hospital and from the community, respectively; thus, selection bias cannot be ignored. Finally, the relatively small sample size, especially for the survival analysis, may have hindered the ability of the study to detect weak gene-disease associations and gene–environment interactions.

## Conclusions

In conclusion, our results suggest that rs74693964 C/T and rs41291957 G/A in the miR-143/145 cluster might have cumulative effects on risk of rectal cancer. Rs712 G/T in *KRAS* might be associated with poorer survival in CRC. Further large population-based prospective studies as well as functional validation are warranted to advance our understanding of the role of these factors in CRC.

## Data Availability

The analysed datasets generated during the study are available from the corresponding author on reasonable request.

## Competing Interests

The authors declare that there are no competing interests associated with the manuscript.

## Funding

This work was supported by the National Natural Science Foundation of China [grant number 81302506]; Traditional Chinese Medicine Foundation of Zhejiang Province [grant number 2018ZA068]; and Foundation of Zhejiang Educational Committee [grant number Y201738284].

## Author Contribution

Danyang Wang and Bing Liu designed the study and Bing Liu applied for Research Ethics Board approval. Danyang Wang, Bing Liu, and Xin Wang recruited the participants and collected the data. Bing Liu and Yan Zhang conducted the experiments. Qingmin Liu and Yanjun Ren analyzed the data and prepared the tables. Danyang Wang and Bing Liu drafted and completed the manuscript. All authors approved the final manuscript.

## Acknowledgements

The authors would like to thank Professor Alfred K. Lam from School of Medicine, Griffith University for his useful comments and language editing which have greatly improved the manuscript.

## Abbreviations

CRC, colorectal cancer; GEO, Gene Expression Omnibus; HR, hazard ratio; miRNA, microRNA; ncRNA, non-coding RNA; OR, odds ratio; OS, overall survival; SNP, single nucleotide polymorphism; TagSNP, tag single nucleotide polymorphism; 3' UTR, 3' Untranslated Region.

## References

- 1 Fitzmaurice, C., Dicker, D., Pain, A., Hamavid, H., Moradi-Lakeh, M., Global Burden of Disease Cancer Consortium et al. (2015) The Global Burden of Cancer 2013. *JAMA Oncol.* **1**, 505–527, <https://doi.org/10.1001/jamaoncol.2015.0735>
- 2 Chen, W., Sun, K., Zheng, R., Zeng, H., Zhang, S., Xia, C. et al. (2018) Cancer incidence and mortality in China, 2014. *Chin. J. Cancer Res.* **30**, 1–12, <https://doi.org/10.21147/j.issn.1000-9604.2018.01.01>
- 3 Yin, Y., Song, M., Gu, B., Qi, X., Hu, Y., Feng, Y. et al. (2016) Systematic analysis of key miRNAs and related signaling pathways in colorectal tumorigenesis. *Gene* **578**, 177–184, <https://doi.org/10.1016/j.gene.2015.12.015>
- 4 Bhartiya, D. and Scaria, V. (2016) Genomic variations in non-coding RNAs: structure, function and regulation. *Genomics* **107**, 59–68, <https://doi.org/10.1016/j.ygeno.2016.01.005>
- 5 Rao, C.V. and Yamada, H.Y. (2013) Genomic instability and colon carcinogenesis: from the perspective of genes. *Front. Oncol.* **3**, 130, <https://doi.org/10.3389/fonc.2013.00130>
- 6 Cordes, K.R., Sheehy, N.T., White, M.P., Berry, E.C., Morton, S.U., Muth, A.N. et al. (2009) miR-145 and miR-143 regulate smooth muscle cell fate and plasticity. *Nature* **460**, 705–710, <https://doi.org/10.1038/nature08195>
- 7 Michael, M.Z., O'Connor, S.M., van Holst Pellekaan, N.G., Young, G.P. and James, R.J. (2003) Reduced accumulation of specific microRNAs in colorectal neoplasia. *Mol. Cancer Res* **1**, 882–891
- 8 Akao, Y., Nakagawa, Y. and Naoe, T. (2007) MicroRNA-143 and -145 in colon cancer. *DNA Cell Biol.* **26**, 311–320, <https://doi.org/10.1089/dna.2006.0550>
- 9 Slattery, M.L., Herrick, J.S., Pellatt, D.F., Stevens, J.R., Mullany, L.E., Wolff, E. et al. (2016) MicroRNA profiles in colorectal carcinomas, adenomas and normal colonic mucosa: variations in miRNA expression and disease progression. *Carcinogenesis* **37**, 245–261, <https://doi.org/10.1093/carcin/bgv249>
- 10 Xu, P., Wang, J., Sun, B. and Xiao, Z. (2018) Integrated analysis of miRNA and mRNA expression data identifies multiple miRNAs regulatory networks for the tumorigenesis of colorectal cancer. *Gene* **659**, 44–51, <https://doi.org/10.1016/j.gene.2018.03.050>
- 11 Gomes, S.E., Pereira, D.M., Roma-Rodrigues, C., Fernandes, A.R., Borralho, P.M. and Rodrigues, C.M.P. (2018) Convergence of miR-143 overexpression, oxidative stress and cell death in HCT116 human colon cancer cells. *PLoS ONE* **13**, e0191607, <https://doi.org/10.1371/journal.pone.0191607>
- 12 Sheng, N., Tan, G., You, W., Chen, H., Gong, J., Chen, D. et al. (2017) MiR-145 inhibits human colorectal cancer cell migration and invasion via PAK4-dependent pathway. *Cancer Med.* **6**, 1331–1340, <https://doi.org/10.1002/cam4.1029>
- 13 Slattery, M.L., Mullany, L.E., Sakoda, L.C., Wolff, R.K., Samowitz, W.S. and Herrick, J.S. (2018) Dysregulated genes and miRNAs in the apoptosis pathway in colorectal cancer patients. *Apoptosis* **23**, 237–250, <https://doi.org/10.1007/s10495-018-1451-1>
- 14 Kent, O.A., Chivukula, R.R., Mullendore, M., Wentzel, E.A., Feldmann, G., Lee, K.H. et al. (2010) Repression of the miR-143/145 cluster by oncogenic Ras initiates a tumor-promoting feed-forward pathway. *Genes Dev.* **24**, 2754–2759, <https://doi.org/10.1101/gad.1950610>
- 15 Chen, X., Guo, X., Zhang, H., Xiang, Y., Chen, J., Yin, Y. et al. (2009) Role of miR-143 targeting KRAS in colorectal tumorigenesis. *Oncogene* **28**, 1385–1392, <https://doi.org/10.1038/onc.2008.474>
- 16 Mazza, T., Mazzoccoli, G., Fusilli, C., Capocefalo, D., Panza, A., Biagini, T. et al. (2016) Multifaceted enrichment analysis of RNA-RNA crosstalk reveals cooperating micro-societies in human colorectal cancer. *Nucleic Acids Res.* **44**, 4025–4036, <https://doi.org/10.1093/nar/gkw245>
- 17 Chen, K. and Rajewsky, N. (2006) Natural selection on human microRNA binding sites inferred from SNP data. *Nat. Genet.* **38**, 1452–1456, <https://doi.org/10.1038/ng1910>
- 18 Gholami, M., Larijani, B., Sharifi, F., Hasani-Ranjbar, S., Taslimi, R., Bastami, M. et al. (2019) MicroRNA-binding site polymorphisms and risk of colorectal cancer: a systematic review and meta-analysis. *Cancer Med.*, <https://doi.org/10.1002/cam4.2600>
- 19 Wu, S., Sun, H., Wang, Y., Yang, X., Meng, Q., Yang, H. et al. (2019) MALAT1 rs664589 polymorphism inhibits binding to miR-194-5p, contributing to colorectal cancer risk, growth, and metastasis. *Cancer Res.* **79**, 5432–5441, <https://doi.org/10.1158/0008-5472.CAN-19-0773>
- 20 Schmit, S.L., Gollub, J., Shaper, M.H., Huang, S.C., Rennett, H.S., Finn, A. et al. (2015) MicroRNA polymorphisms and risk of colorectal cancer. *Cancer Epidemiol. Biomarkers Prev.* **24**, 65–72, <https://doi.org/10.1158/1055-9965.EPI-14-0219>
- 21 Luo, X., Burwinkel, B., Tao, S. and Brenner, H. (2011) MicroRNA signatures: novel biomarker for colorectal cancer? *Cancer Epidemiol. Biomarkers Prev.* **20**, 1272–1286, <https://doi.org/10.1158/1055-9965.EPI-11-0035>
- 22 Wan, X.B., Wang, A.Q., Cao, J., Dong, Z.C., Li, N., Yang, S. et al. (2019) Relationships among KRAS mutation status, expression of RAS pathway signaling molecules, and clinicopathological features and prognosis of patients with colorectal cancer. *World J. Gastroenterol.* **25**, 808–823, <https://doi.org/10.3748/wjg.v25.i7.808>
- 23 Ryan, B.M., Robles, A.I. and Harris, C.C. (2010) Genetic variation in microRNA networks: the implications for cancer research. *Nat. Rev. Cancer* **10**, 389–402, <https://doi.org/10.1038/nrc2867>

- 24 Ward, L.D. and Kellis, M. (2016) HaploReg v4: systematic mining of putative causal variants, cell types, regulators and target genes for human complex traits and disease. *Nucleic Acids Res.* **44**, D877–D881, <https://doi.org/10.1093/nar/gkv1340>
- 25 Boyle, A.P., Hong, E.L., Hariharan, M., Cheng, Y., Schaub, M.A., Kasowski, M. et al. (2012) Annotation of functional variation in personal genomes using RegulomeDB. *Genome Res.* **22**, 1790–1797, <https://doi.org/10.1101/gr.137323.112>
- 26 Chuanyin, L., Xiaona, W., Zhiling, Y., Yu, Z., Shuyuan, L., Jie, Y. et al. (2017) The association between polymorphisms in microRNA genes and cervical cancer in a Chinese Han population. *Oncotarget* **8**, 87914–87927, <https://doi.org/10.18632/oncotarget.21235>
- 27 Li, C., Zhang, Y., Li, Y., Ma, Q., Liu, S., Yao, Y. et al. (2018) The association of polymorphisms in miRNAs with nonsmall cell lung cancer in a Han Chinese population. *Cancer Manag. Res.* **10**, 697–704, <https://doi.org/10.2147/CMAR.S154040>
- 28 Li, L., Pan, X., Li, Z., Bai, P., Jin, H., Wang, T. et al. (2013) Association between polymorphisms in the promoter region of miR-143/145 and risk of colorectal cancer. *Hum. Immunol.* **74**, 993–997, <https://doi.org/10.1016/j.humimm.2013.04.019>
- 29 Ying, H.Q., Peng, H.X., He, B.S., Pan, Y.Q., Wang, F., Sun, H.L. et al. (2016) MiR-608, pre-miR-124-1 and pre-miR26a-1 polymorphisms modify susceptibility and recurrence-free survival in surgically resected CRC individuals. *Oncotarget* **7**, 75865–75873, <https://doi.org/10.18632/oncotarget.12422>
- 30 Saini, H.K., Griffiths-Jones, S. and Enright, A.J. (2007) Genomic analysis of human microRNA transcripts. *Proc. Natl. Acad. Sci. U.S.A.* **104**, 17719–17724, <https://doi.org/10.1073/pnas.0703890104>
- 31 Han, M. and Zheng, Y. (2013) Comprehensive analysis of single nucleotide polymorphisms in human microRNAs. *PLoS ONE* **8**, e78028, <https://doi.org/10.1371/journal.pone.0078028>
- 32 Chivukula, R.R., Shi, G., Acharya, A., Mills, E.W., Zeitels, L.R., Anandam, J.L. et al. (2014) An essential mesenchymal function for miR-143/145 in intestinal epithelial regeneration. *Cell* **157**, 1104–1116, <https://doi.org/10.1016/j.cell.2014.03.055>
- 33 O'Brien, S.J., Carter, J.V., Burton, J.F., Oxford, B.G., Schmidt, M.N., Hallion, J.C. et al. (2018) The role of the miR-200 family in epithelial-mesenchymal transition in colorectal cancer: a systematic review. *Int. J. Cancer* **142**, 2501–2511, <https://doi.org/10.1002/ijc.31282>
- 34 Pichler, M., Röss, A.L., Winter, E., Stiegelbauer, V., Karbiener, M., Schwarzenbacher, D. et al. (2014) MiR-200a regulates epithelial to mesenchymal transition-related gene expression and determines prognosis in colorectal cancer patients. *Br. J. Cancer* **110**, 1614–1621, <https://doi.org/10.1038/bjc.2014.51>
- 35 Pan, X.M., Sun, R.F., Li, Z.H., Guo, X.M., Zhang, Z., Qin, H.J. et al. (2014) A let-7 KRAS rs712 polymorphism increases colorectal cancer risk. *Tumour Biol.* **35**, 831–835, <https://doi.org/10.1007/s13277-013-1114-3>
- 36 Jin, H., Liang, Y., Wang, X., Zhu, J., Sun, R., Chen, P. et al. (2014) Association between a functional polymorphism rs712 within let-7-binding site and risk of papillary thyroid cancer. *Med. Oncol.* **31**, 221, <https://doi.org/10.1007/s12032-014-0221-3>
- 37 Du, X.Y., Hu, Y.Y., Xie, C., Deng, C.Y., Liu, C.Y., Luo, Z.G. et al. (2017) Significant association between Let-7-KRAS rs712 G > T polymorphism and cancer risk in the Chinese population: a meta-analysis. *Oncotarget* **8**, 13863–13871, <https://doi.org/10.18632/oncotarget.14672>
- 38 Schneiderova, M., Naccarati, A., Pardini, B., Rosa, F., Gaetano, C.D., Jiraskova, K. et al. (2017) MicroRNA-binding site polymorphisms in genes involved in colorectal cancer etiopathogenesis and their impact on disease prognosis. *Mutagenesis* **32**, 533–542, <https://doi.org/10.1093/mutage/gex026>
- 39 Dai, Q., Wei, H.L., Huang, J., Zhou, T.J., Chai, L. and Yang, Z.H. (2016) KRAS polymorphisms are associated with survival of CRC in Chinese population. *Tumour Biol.* **37**, 4727–4734, <https://doi.org/10.1007/s13277-015-4314-1>
